# Supplementary figures and images for: Synthesis of MnCoO/CNT nanoflakes for the photocatalytic degradation of methyl orange dye and the evaluation of their activity against Culex pipiens larvae in the purification of fresh water
Source: Royal Society of Chemistry journal article supplement (doi:10.1039/d2ra04823j), 2022-01-01

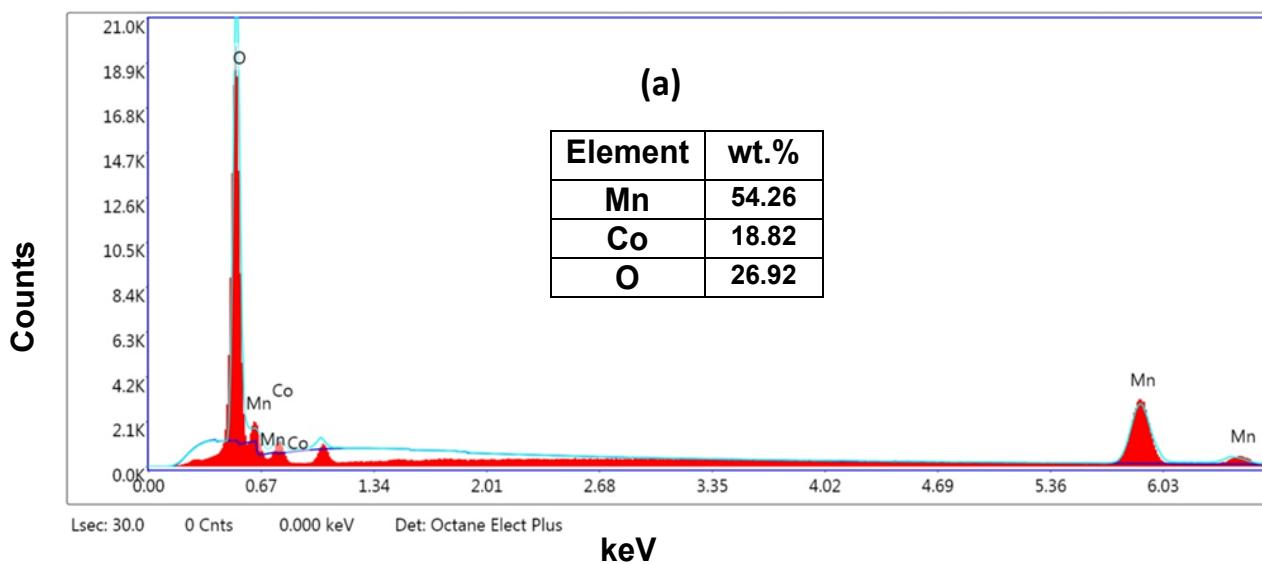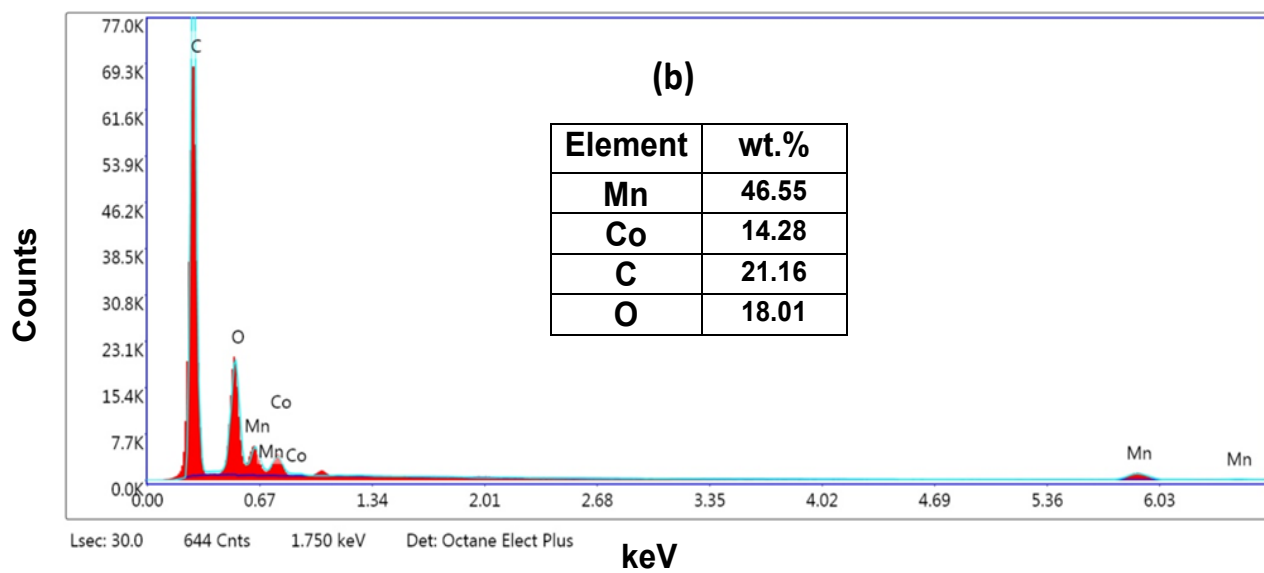

Fig. S1 (a,b). EDX spectra of the nanocomposites MnCoO and MnCoO/CNTs.

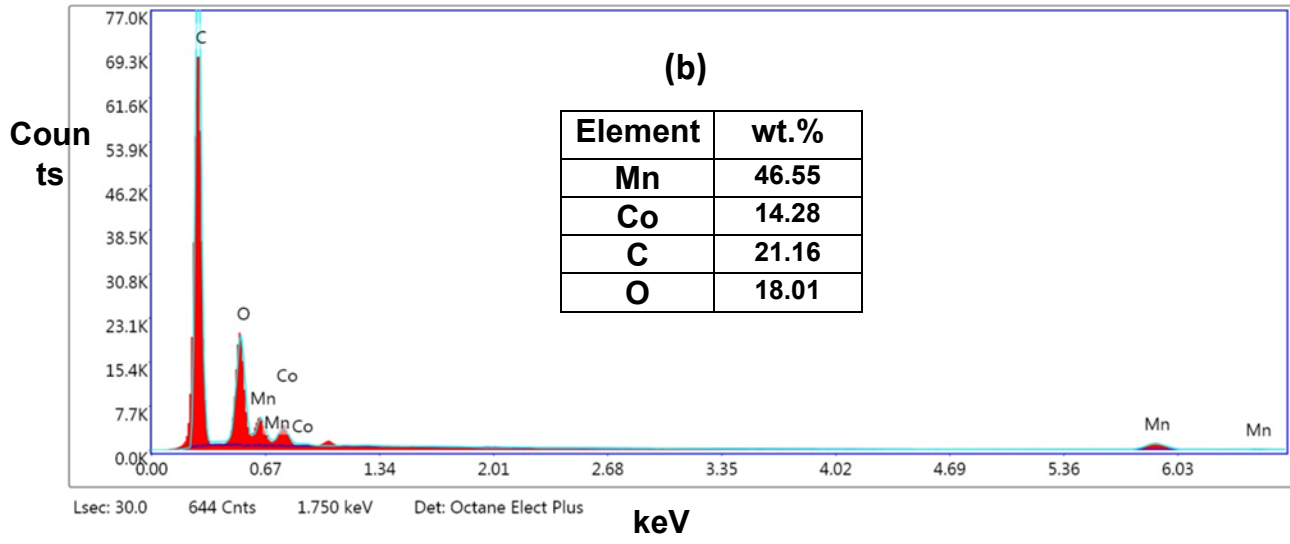

Supplement: d2ra04823j1.pdf [file d2ra04823j1.pdf]
